# Supplementary material for: ERK-mediated NELF-A phosphorylation promotes transcription elongation of immediate-early genes by releasing promoter-proximal pausing of RNA polymerase II
Source: Springer Nature journal article supplement (doi:10.1038/s41467-022-35230-4), 2022-12-03
Supplement: MOESM1 [file 41467_2022_35230_MOESM1_ESM.pdf]

## Supplementary Information

### **ERK-mediated NELF-A phosphorylation promotes transcription elongation of immediate-early genes by releasing promoter-proximal pausing of RNA polymerase II**

Seina Ohe<sup>1,2</sup>, Yuji Kubota<sup>1</sup>, Kiyoshi Yamaguchi<sup>3</sup>, Yusuke Takagi<sup>1</sup>, Junichiro Nashimoto<sup>1</sup>, Hiroko Kozuka-Hata<sup>4</sup>, Masaaki Oyama<sup>4</sup>, Yoichi Furukawa<sup>3</sup>, and Mutsuhiro Takekawa<sup>1,2,4,\*</sup>

<sup>1</sup>Division of Cell Signaling and Molecular Medicine, Institute of Medical Science, The University of Tokyo, 4-6-1 Shirokanedai, Minato-ku, Tokyo 108-8639, Japan

<sup>2</sup>Department of Computational Biology and Medical Sciences, Graduate School of Frontier Sciences, The University of Tokyo, Chiba 277-8583, Japan

<sup>3</sup>Division of Clinical Genome Research, Institute of Medical Science, The University of Tokyo, 4-6-1 Shirokanedai, Minato-ku, Tokyo 108-8639, Japan

<sup>4</sup>Medical Proteomics Laboratory, Institute of Medical Science, The University of Tokyo, 4-6-1 Shirokanedai, Minato-ku, Tokyo 108-8639, Japan

\*Correspondence to: [takekawa@ims.u-tokyo.ac.jp](mailto:takekawa@ims.u-tokyo.ac.jp)

Supplementary Tables 1

Supplementary Figures 1-6

**Supplementary Table 1. Oligonucleotide sequences for siRNA, shRNA, and qPCR primers.**

**siRNA sequences for CDK9 knockdown**

| Gene    | Sequence                    |
|---------|-----------------------------|
| CDK9_s  | 5'-GGUGCUGAUGGAAAACGAGTT-3' |
| CDK9_as | 5'-CUCGUUUUCCAUCAGCACCTT-3' |

**shRNA sequences for NELF-A knockdown**

| Gene             | Sequence                                                                 |
|------------------|--------------------------------------------------------------------------|
| shNELF-A forward | 5'-gatccccGAGTGCCAGTACTTGAACAAAttcaagagaTTTGTTC AAGTACTGG CACTCtttta-3'  |
| shNELF-A reverse | 5'-agcttaaaaaGAGTGCCAGTACTTGAACAAAtctcttgaaTTTGTTC AAGTACTG GCACTCggg-3' |

**Primers for qRT-PCR**

| Gene      | Sequence                       |
|-----------|--------------------------------|
| FOS-F     | 5'-CACTCCAAGCGGAGACAGAC-3'     |
| FOS-R     | 5'-GAGCTGCCAGGATGAACTCT-3'     |
| JUNB-F    | 5'-CACCAAGTGCCGGAAGCGGA-3'     |
| JUNB-R    | 5'-AGGGGCAGGGGACGTTTCAGA-3'    |
| FOSB-F    | 5'-GTGCGCCGGAACGAATAA-3'       |
| FOSB-R    | 5'-CCAAGTATCTGTCTCCGCC-3'      |
| EGR1-F    | 5'-CACCTGACCGCAGAGTCTT-3'      |
| EGR1R     | 5'-GCGGCCAGTATAGGTGATGG-3'     |
| EGR2-F    | 5'-AGACAGGAGAGAGTAGCGAGGG-3'   |
| EGR2-R    | 5'-TTTTGTCTACGGCCTTGGCG-3'     |
| TRIB1-F   | 5'-AGCAGATTGTCTCCGCCGTC-3'     |
| TRIB1-R   | 5'-TAAGCTGGGTCTCTCCTCCG-3'     |
| GADD45B-F | 5'-ATTGCAACATGACGCTGGAAGAGC-3' |
| GADD45B-R | 5'-GGATGAGCGTGAAGTGGATT-3'     |
| GAPDH-F   | 5'-ATCCTGGGCTACACTGAGCA-3'     |
| GAPDH-R   | 5'-GGTGGTCCAGGGGTCTTACT-3'     |
| BTG1-F    | 5'-GAGCTGCTGGCAGAACATTA-3'     |
| BTG1-R    | 5'-TACAACGGTAACCCGATCCC-3'     |
| SOWAHC-F  | 5'-GAAAAAGGCCTCCCAGTACC-3'     |
| SOWAHC-R  | 5'-GGTCCCCTCCATCTTCTAGG-3'     |

**Primers for ChIP-qPCR (TSS position was searched on DBTSS)**

| Gene (position)                       | Sequence                        |
|---------------------------------------|---------------------------------|
| FOS control-F (-2225 to -2201)        | 5'-GATCTAGTTGTGAATGGCAGTCATG-3' |
| FOS control-R (-2198 to -2175)        | 5'-TCAAGCTTTGAATTCCTGAGTCTG-3'  |
| FOS TSS-F (-73 to -56)                | 5'-TGAGCCCGTGACGTTTAC-3'        |
| FOS TSS-R (-5 to +13)                 | 5'-TGCAGATGCGGTTGGAG-3'         |
| FOS gene body (1)-F (+1070 to +1089)  | 5'-CGTCTCCAGTGCCAACTTCA-3'      |
| FOS gene body (1)-R (+1105 to +1122)  | 5'-CCGGACTGGTCGAGATGG-3'        |
| FOS gene body (2)-F (+1809 to +1824)  | 5'-GGAGGAGGGAGCTGACTGAT-3'      |
| FOS gene body (2)-R (+1838 to +1857)  | 5'-ACCCACAGAGTACCTACCGC-3'      |
| JUNB control-F (-3121 to -3101)       | 5'-TGCCTAGCCACAGTAAGAGC-3'      |
| JUNB control-R (-3034 to -3014)       | 5'-TGTCACGCAGACAGTGAGACT-3'     |
| JUNB TSS-F (-3 to +15)                | 5'-GGCTGGGACCTTGAGAGC-3'        |
| JUNB TSS-F (+116 to +133)             | 5'-GTGCGCAAAAGCCCTGTC-3'        |
| JUNB gene body (1)-F (+707 to +726)   | 5'-CAAAGCCCTGGACGATCTGCACA-3'   |
| JUNB gene body (1)-R (+732 to +726)   | 5'-GGGGGTGTACGTGGTTCAT-3'       |
| JUNB gene body (2)-F (+1317 to +1336) | 5'-GGACACGCCTTCTGAACGTC-3'      |
| JUNB gene body (2)-R (+1347 to +1366) | 5'-AAGCGAGGGGGTGTCCGTAA-3'      |

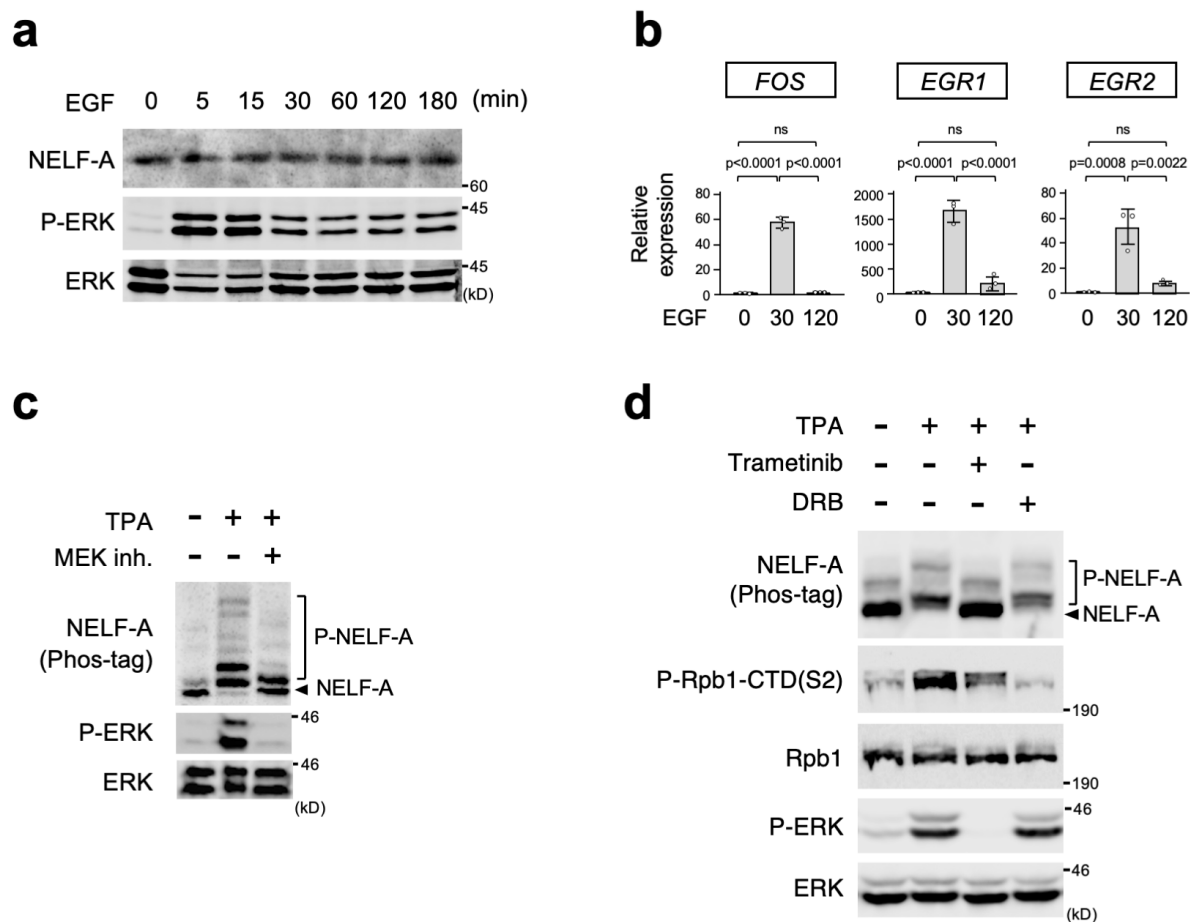

**Supplementary Fig. 1 Mitogens induce NELF-A phosphorylation through the ERK pathway.**

**a** HeLa cells were treated with EGF (20 ng/ml) for the indicated times. Cell extracts were separated on conventional SDS-PAGE and probed for endogenous NELF-A (top), phosphorylated ERK1/2 (P-ERK) (second), and ERK1/2 (bottom) by immunoblotting with the appropriate antibodies.

**b** HeLa cells were stimulated with EGF (20 ng/ml) for the indicated times. Total RNA was extracted and analyzed for the indicated mRNA expression using qRT-PCR. The expression levels of the IEGs are significantly reduced at 120 min after EGF, when ERK is still moderately activated but NELF-A is almost completely dephosphorylated (see Fig. 1f, left panel). All data were normalized to the level of *GAPDH* expression. Error bars, SEM (n=3). P-values were assessed using a one-way ANOVA Tukey test. ns, not significant.

**c** HEK293 cells were pretreated with (+) or without (-) a MEK inhibitor (trametinib, 10  $\mu$ M) and stimulated with TPA (300 nM, for 45 min) as indicated. Phosphorylation status of endogenous NELF-A was analyzed as in Fig. 1f.

**d** Trametinib (the MEK inhibitor), but not DRB (a CDK9 inhibitor), suppresses TPA-induced NELF-A phosphorylation. HeLa cells were pretreated with trametinib (10  $\mu$ M) or DRB (100  $\mu$ M) and stimulated with TPA (300 nM, for 30 min) as indicated. Phosphorylation states of NELF-A and Pol II (Rpb1)-CTD(Ser2) were assessed by Phos-tag SDS-PAGE and immunoblotting, respectively. Cell lysates were probed for phosphorylated-ERK (P-ERK) and ERK by immunoblotting (lower rows). Source data are provided as a Source Data file.

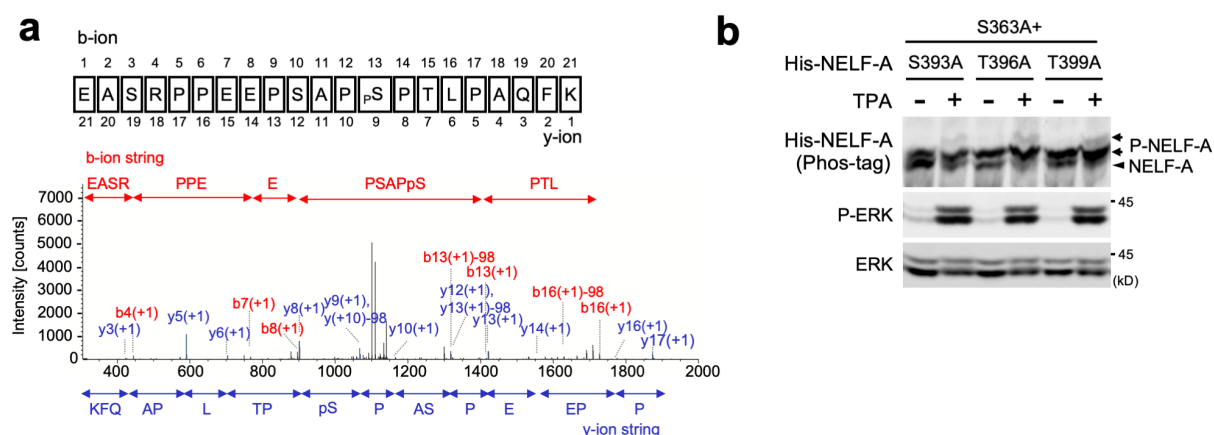

**Supplementary Fig. 2 Identification of the NELF-A phosphorylation sites.**

**a** The MS/MS spectra of the precursor ions spanning NELF-A Ser<sup>363</sup>. Scheme of the predicted b- and y- ions is shown in the upper panel. The MS/MS spectra from phosphorylated NELF-A are shown in the lower panel.

**b** HEK293 cells were transfected with His-NELF-A with various double point mutations as indicated, and then treated with or without TPA (300 nM, for 15 min). Phosphorylation of His-NELF-A was analyzed using Phos-tag SDS-PAGE followed by immunoblotting using an anti-His antibody (upper). Cell lysates were immunoblotted for phospho-ERK1/2 and ERK1/2 (lower panels).

Source data are provided as a Source Data file.

**a**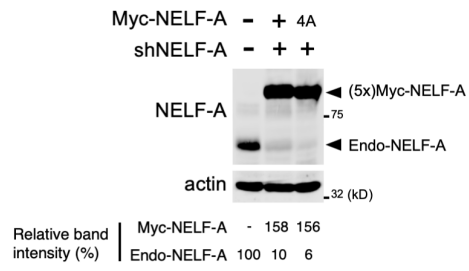**b**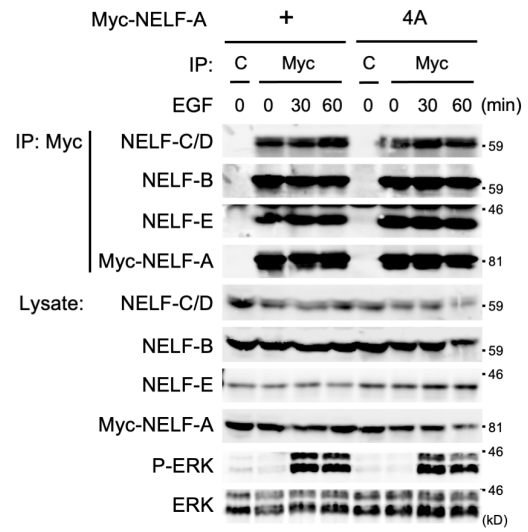**c**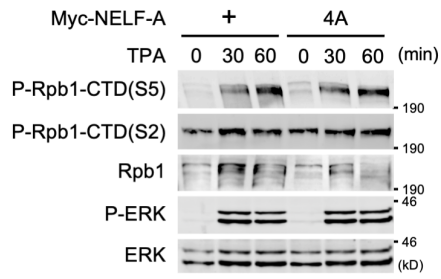**d**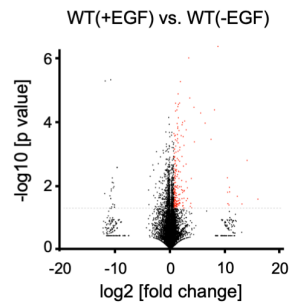**e**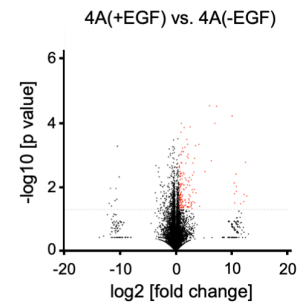**f**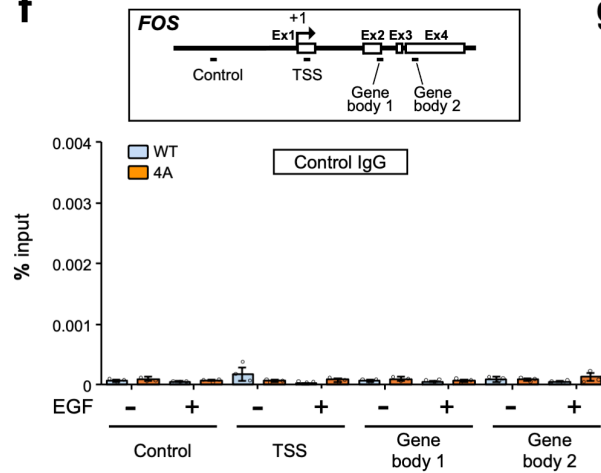**g**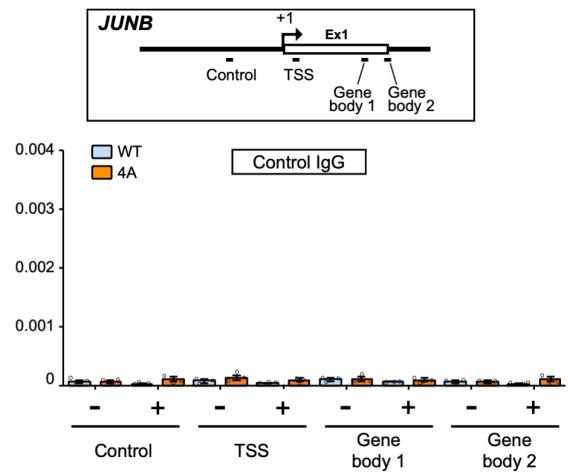

**Supplementary Fig. 3 ERK-mediated NELF-A phosphorylation promotes transcriptional elongation of IEGs.**

**a** Quantification of the expression levels of endogenous and exogenous NELF-A proteins in HEK293-WT and HEK293-4A cells. The intensity of endogenous NELF-A, Myc-NELF-A, and Myc-NELF-A(4A) bands in the western blot shown in Fig. 3a was quantified by densitometry.

**b** The 4A mutations do not affect the NELF complex formation. HEK293-WT and -4A cells were stimulated with EGF (20 ng/ml) for the indicated times. Myc-NELF-A (WT or 4A) was then immunoprecipitated, and coprecipitating endogenous NELF subunits (NELF-C/D, -B, and E) were detected by immunoblotting with their specific antibodies. The levels of protein expression in cell lysates are also shown in the lower rows. C, control IgG.

**c** HEK293-WT and -4A cells were stimulated with TPA (300 nM) for the indicated times. Cell lysates were probed for phospho-Ser5 (top) and phospho-Ser2 (second) in the C-terminal domain of Pol II (Rpb1). The total amounts of Rpb1 are also shown (third).

**b,c** ERK1/2 activation was monitored by immunoblotting using an anti-phospho-ERK antibody (P-ERK).

**d,e** Transcriptome analyses of HEK293-WT and -4A cells treated with or without EGF. The gene expression profiles of the cells were analyzed by targeted RNA sequencing using the Ion AmpliSeq transcriptome human gene expression research panel (n=3). Genes differentially expressed between before and 60 min after EGF stimulation in HEK293-WT cells (**d**) and in HEK293-4A cells (**e**) are displayed as volcano plots (x-axis: fold-change [log2], y-axis: p-value [-log10]). Red dots indicate significantly upregulated mRNA transcripts after EGF stimulation (FC > 1.5, p < 0.05).

**f,g** Control ChIP-qPCR data corresponding to the experiments shown in Figures 4b and 4d. (Upper insets) Schematic diagrams of the *FOS* (**f**) and *JUNB* (**g**) genomic loci. The boxes represent exons. The bars below the genes show the positions of amplicons used for ChIP-qPCR analysis. TSS, transcription start site. (Lower graphs) ChIP-qPCR assays were performed with control IgG and chromatin prepared from HEK293-WT or -4A cells simulated with (+) or without (-) EGF (20 ng/ml for 30 min) as indicated. Error bars, SEM (n=3).

Source data are provided as a Source Data file.

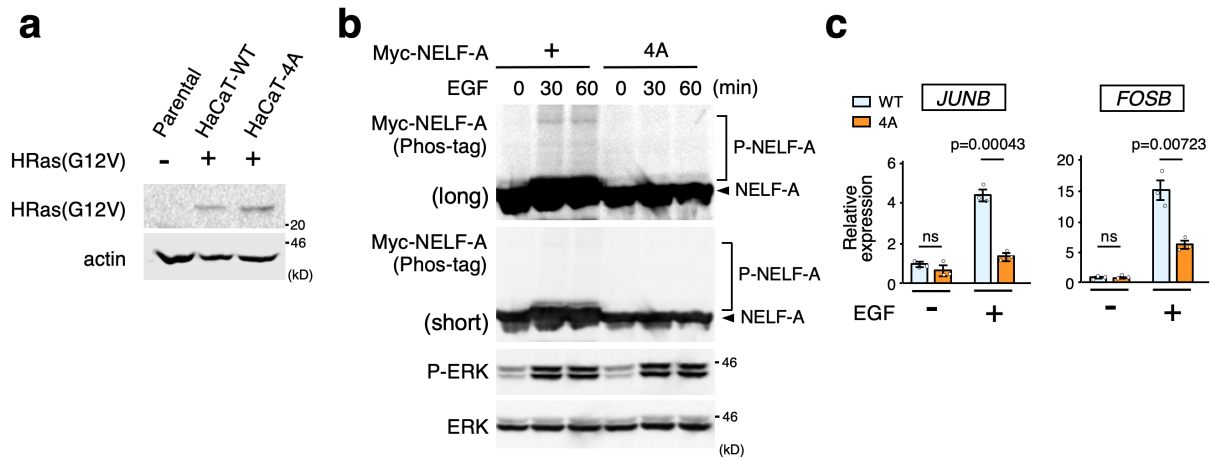

**Supplementary Fig. 4 ERK-mediated NELF-A phosphorylation promotes cell growth and tumorigenesis.**

**a** Western blot analysis of H-Ras(G12V) expression in Ras-HaCaT-WT and Ras-HaCaT-4A cells. The expression levels of an oncogenic H-Ras(G12V) mutant and actin (loading control) in Ras-HaCaT-WT and Ras-HaCaT-4A cells were analyzed by immunoblotting using an anti-Ras G12V antibody and an anti-actin antibody.

**b** Ras-HaCaT-WT and Ras-HaCaT-4A cells were stimulated with EGF for the indicated times. Lysates were separated on Phos-tag SDS-PAGE and immunoblotted with anti-NELF-A antibody (upper rows). Long, long exposure. Short, short exposure. P-NELF-A, phosphorylated NELF-A. Cell lysate were probed for phosphorylated ERK1/2 (P-ERK) and total ERK1/2 by immunoblotting (lower rows) as indicated.

**c** Ras-HaCaT-WT and Ras-HaCaT-4A cells were stimulated with or without EGF (60 ng/ml, for 60 min). Total RNA was extracted and analyzed for the indicated mRNA expression using qRT-PCR. All data were normalized to the level of *GAPDH* expression. Error bars, SEM (n=3).

Source data are provided as a Source Data file.

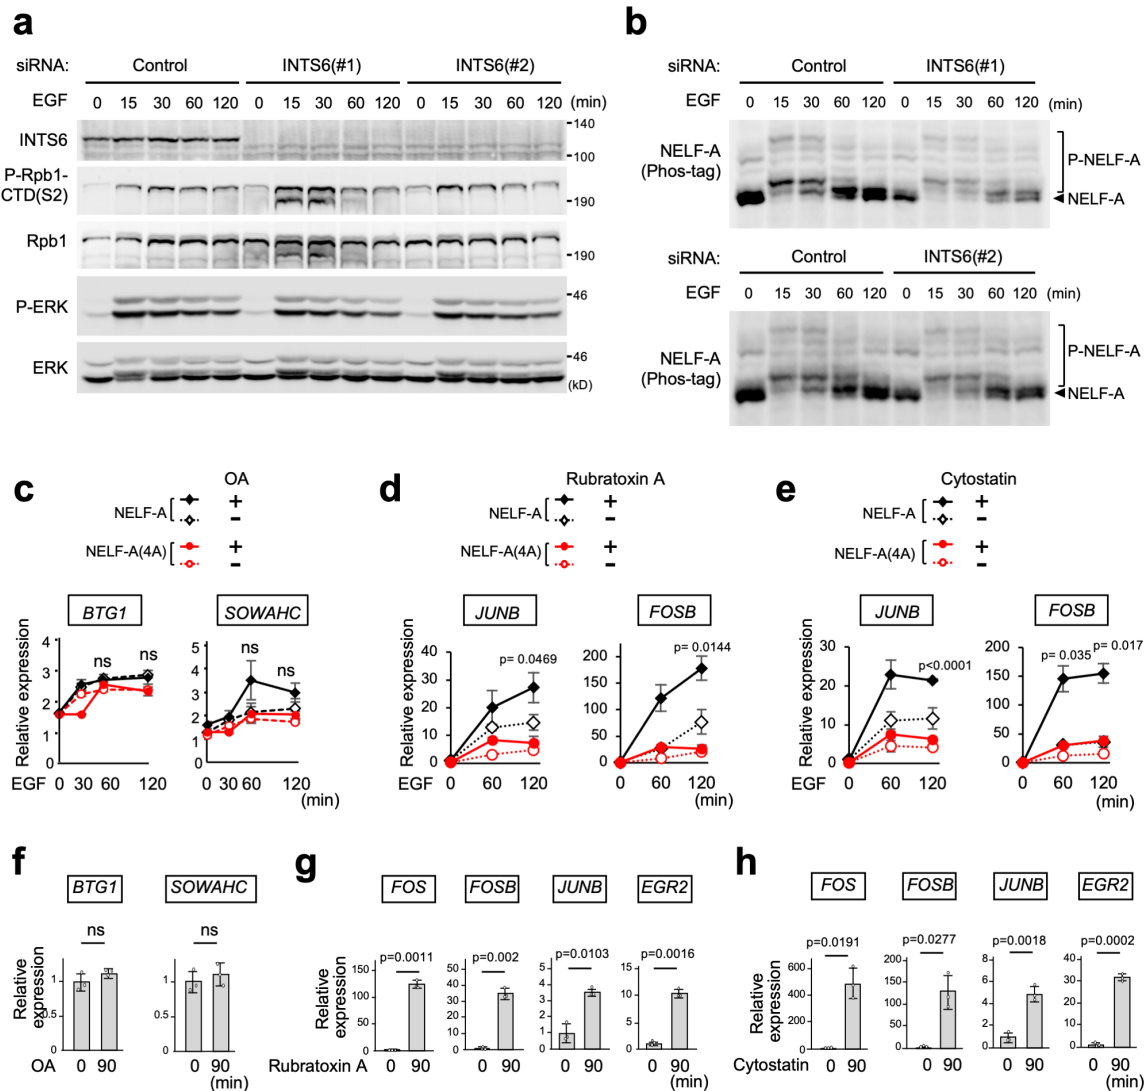

**Supplementary Fig. 5 PP2A counteracts NELF-A phosphorylation.**

**a,b** Inhibition of the non-canonical Integrator-PP2A complex (INTAC) suppresses dephosphorylation of Pol II-CTD(Ser2), but not that of NELF-A. HeLa cells were transfected with control siRNA or siRNAs (#1 or #2) targeting INTS6 (an essential component of INTAC). The cells were then stimulated with EGF for the indicated times. In **a**, the expression level of INTS6 and the phosphorylation states of Pol-II (Rpb1)-CTD(Ser2) and ERK were analyzed by immunoblotting. In **b**, the phosphorylation status of NELF-A was assessed using Phos-tag SDS-PAGE followed by immunoblotting with an anti-NELF-A antibody.

**c,f** Okadaic acid (OA) treatment does not significantly affect the expression levels of *BTG1* or *SOWAHC*. Since EGF stimulation upregulated the expression of these genes similarly in both HEK293-WT and -4A cells, we used them as negative controls for NELF-A phosphorylation-dependent gene regulation. In **c**, HEK293-WT (black lines) and -4A (red lines) cells were stimulated with EGF in the presence or absence of OA. In **f**, A375 cells were treated with OA for 90 min. Levels of the indicated mRNAs were quantified using qRT-PCR.

**d,e,g,h** In **d** and **e**, HEK293-WT (black lines) and -4A (red lines) cells were stimulated with EGF for the indicated times in the presence or absence of highly specific PP2A inhibitors, rubratoxin A (**d**) or cytochalasin (**e**). In **g** and **h**, H1299 cells were treated with rubratoxin A (**g**) or cytochalasin (**h**) for 90 min. Levels of the indicated mRNAs were quantified using qRT-PCR.

**c-h**, Data were normalized to *GAPDH* expression. Error bars, SEM (n=3). P-values were assessed using a two-tailed Student's t-test. Source data are provided as a Source Data file.

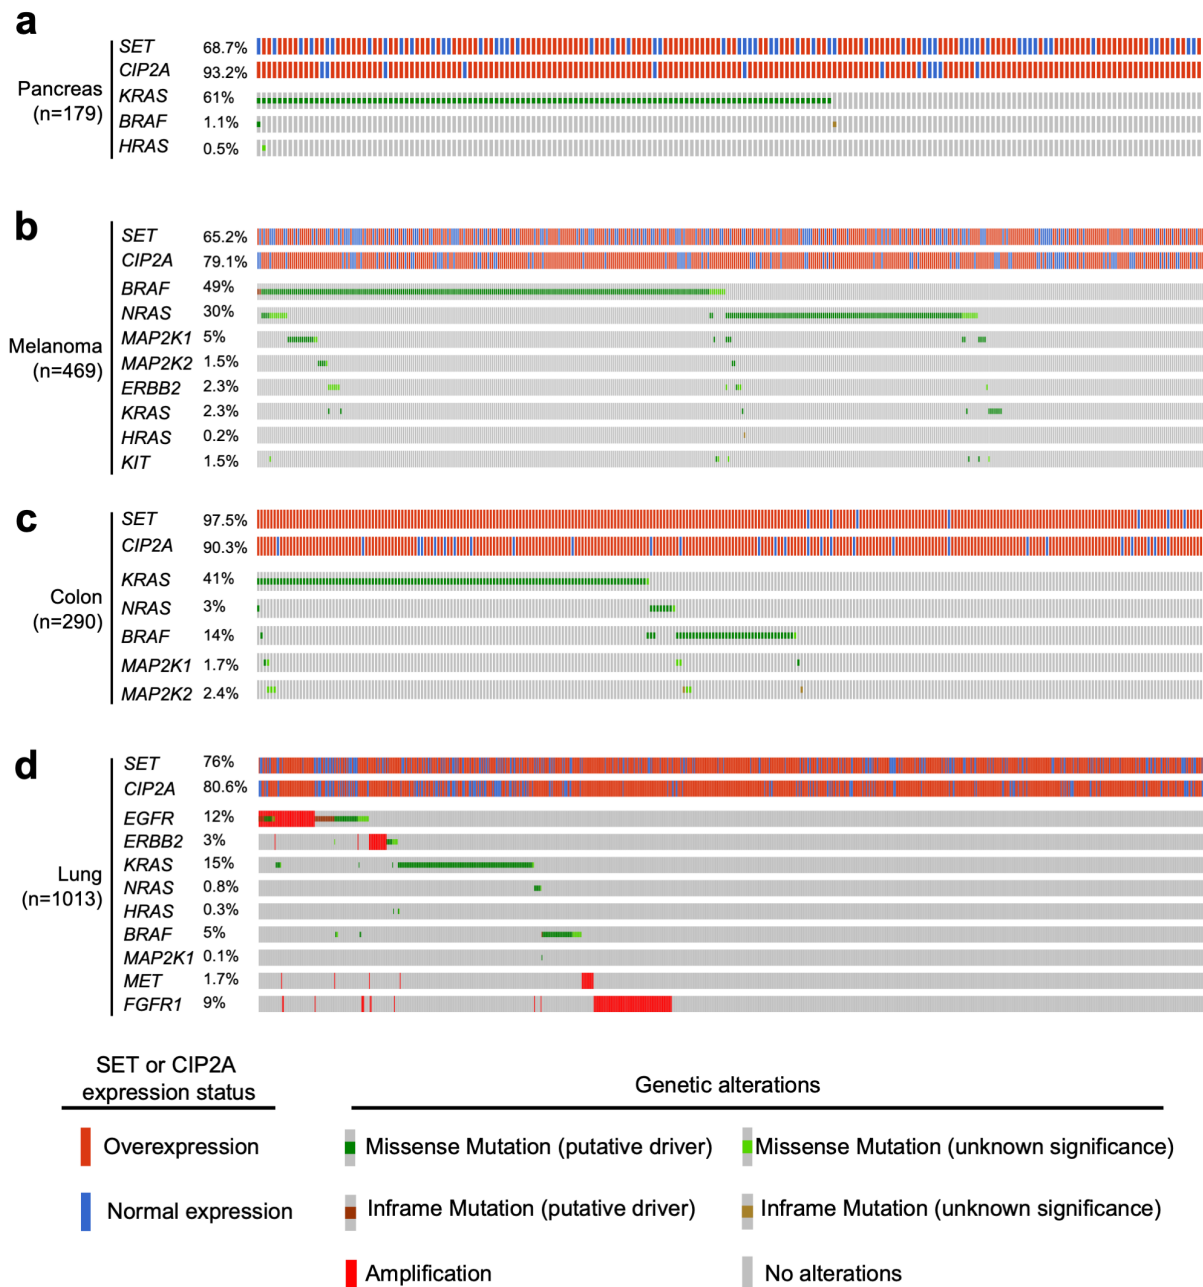

**Supplementary Fig. 6 Distribution and co-occurrence of SET/CIP2A overexpression and genetic alterations in prominent ERK-activating oncogenes in various cancers.**

**a-d**, OncoPrint plots showing SET/CIP2A overexpression and genetic alterations of prominent ERK-activating oncogenes in pancreas (**a**), skin melanoma (**b**), colon (**c**), and lung (**d**) cancer tissues from the TCGA database. Cancers in which SET or CIP2A expression is higher than the top 5% level of the corresponding normal tissues are defined as SET- or CIP2A-high cancers (see Fig. 8a,b). Each column represents a patient, and each row represents a gene. Numbers on the left represent the percentage of patients with alterations in a specific gene. Types of alterations are color-coded (bottom).
